# Supplementary material
Source: PubMed Central journal article supplement (PMC4262743)
Supplement: NIHMS598993-supplement-01.pdf [file NIHMS598993-supplement-01.pdf]

Type of file: table

Label: Supp TableS1

Filename: Supplemental Table 1.docx

**Supplemental Table 1. Summary of Protein Parameters.**

| <b>Protein</b> | <b>Extinction coefficient</b> | <b>Molecular weight</b> |
|----------------|-------------------------------|-------------------------|
| <b>IpaD</b>    | 36900                         | 38802                   |
| <b>SipD</b>    | 36900                         | 36549                   |
| <b>LcrV</b>    | 23380                         | 34430                   |
| <b>IpaD-PA</b> | 73340                         | 61298                   |
| <b>SipD-PA</b> | 73340                         | 59045                   |
| <b>LcrV-PA</b> | 59820                         | 56926                   |

Extinction coefficients and molecular weights of the proteins were obtained from ProtParam at the ExPASy website.
