# Supplementary material
Source: PubMed Central journal article supplement (PMC4262743)

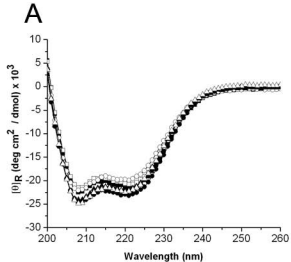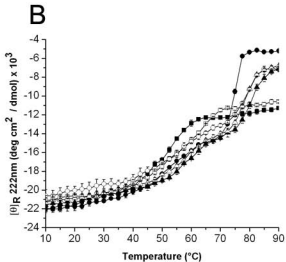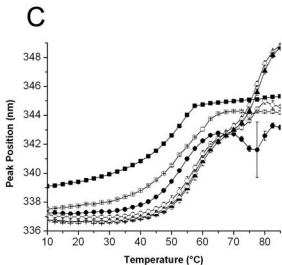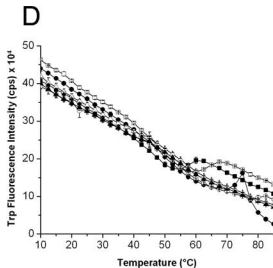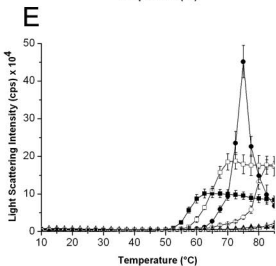

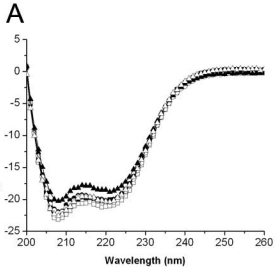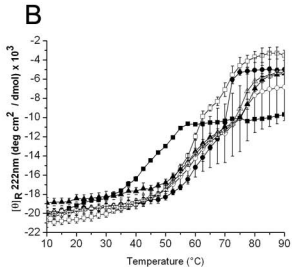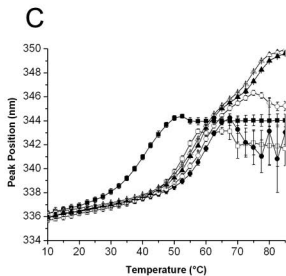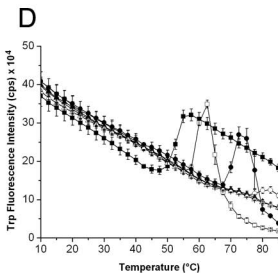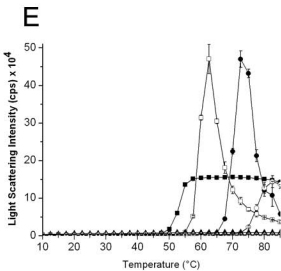

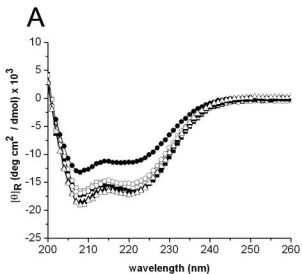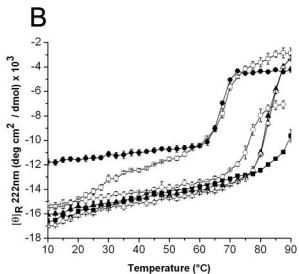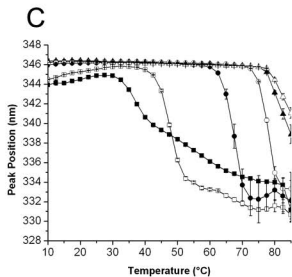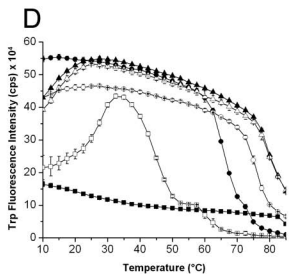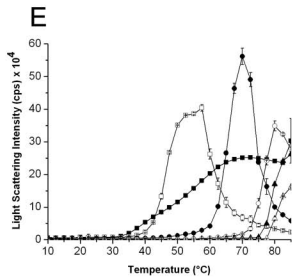

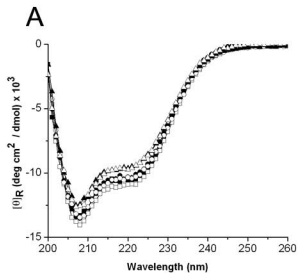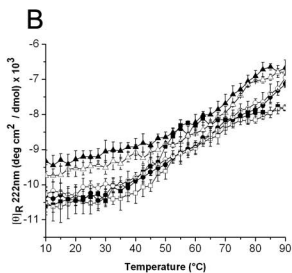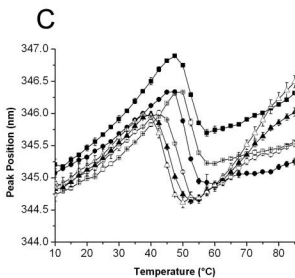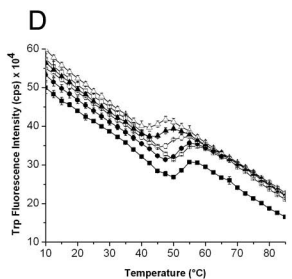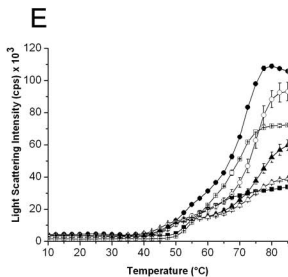

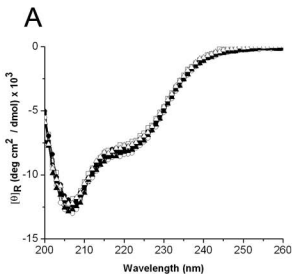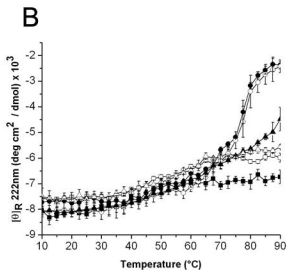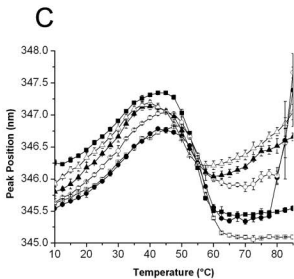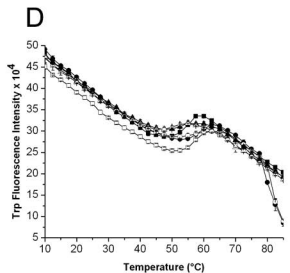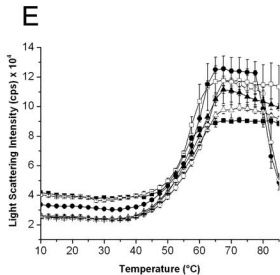

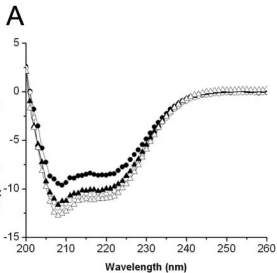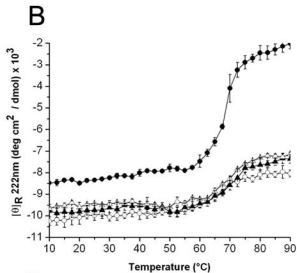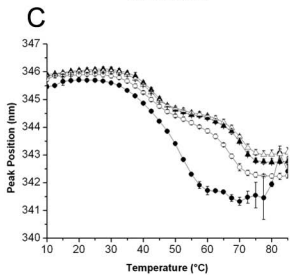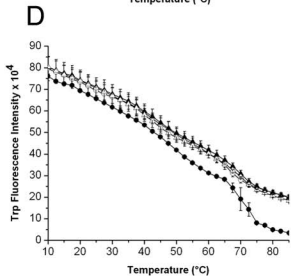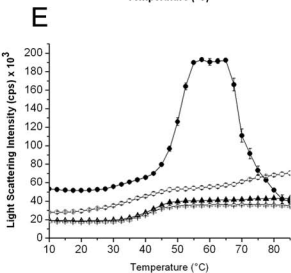

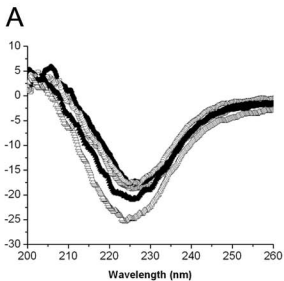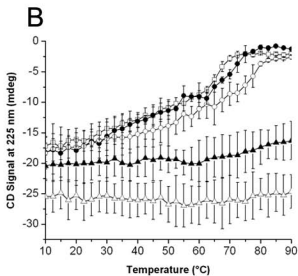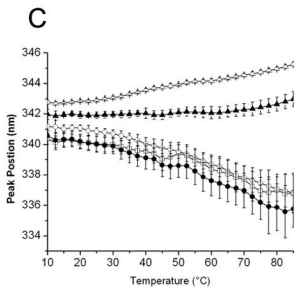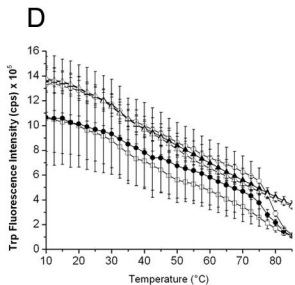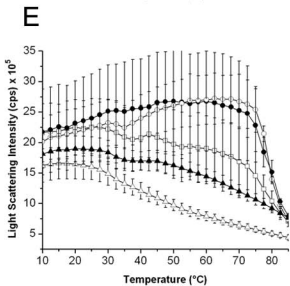

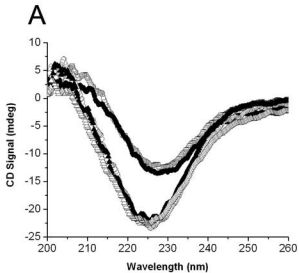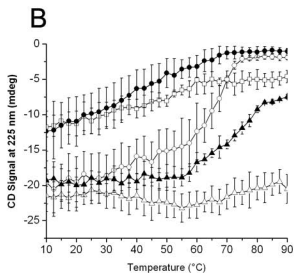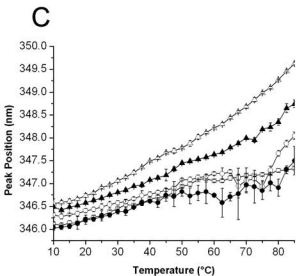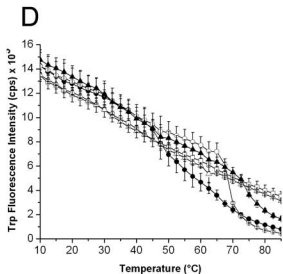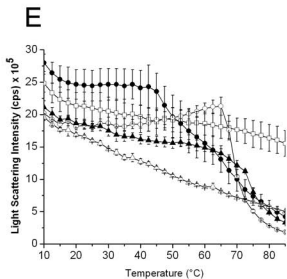



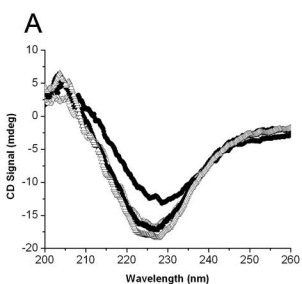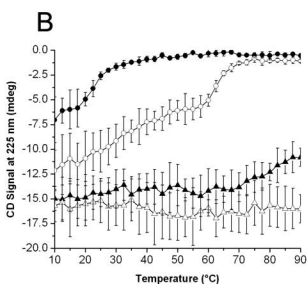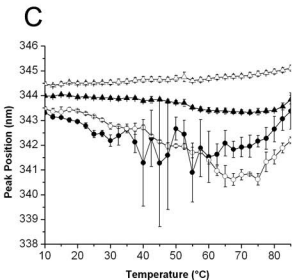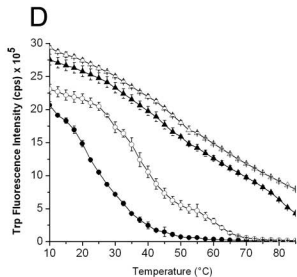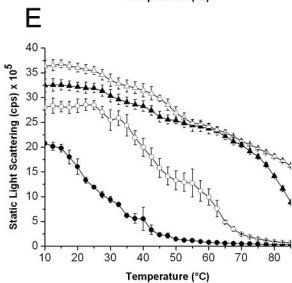

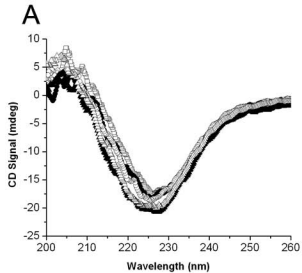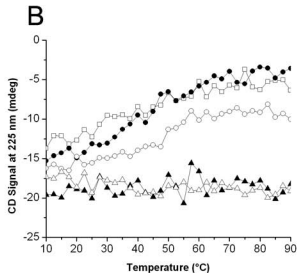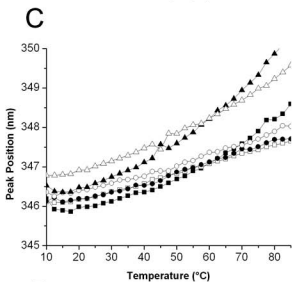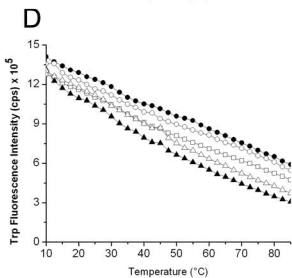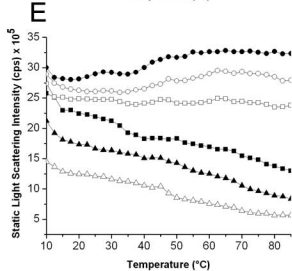

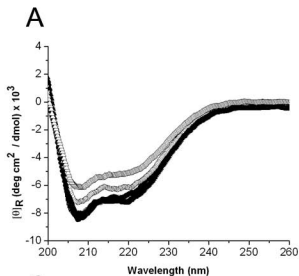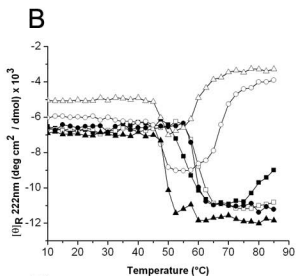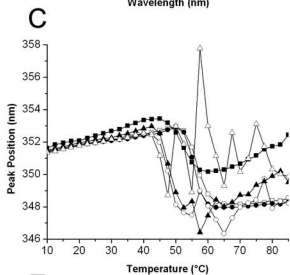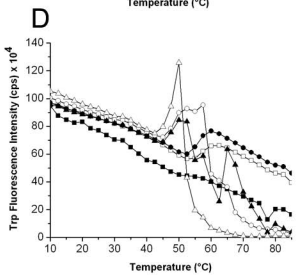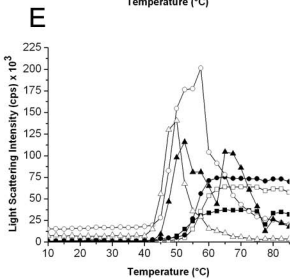

**A**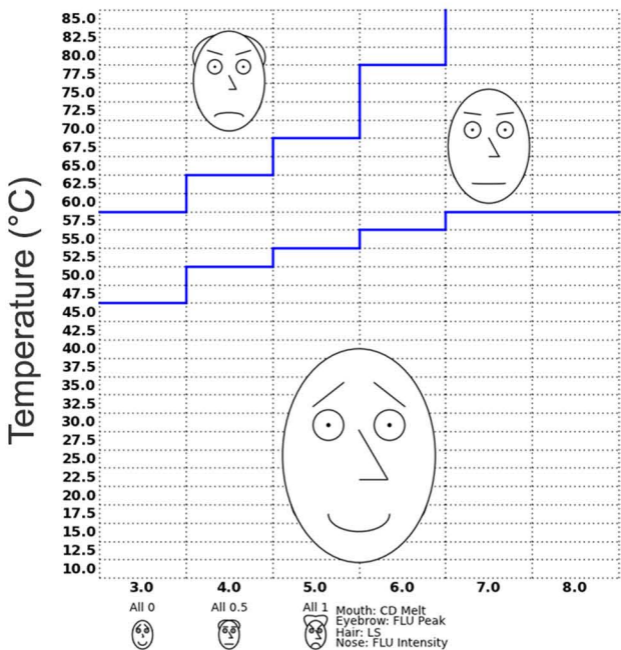**B**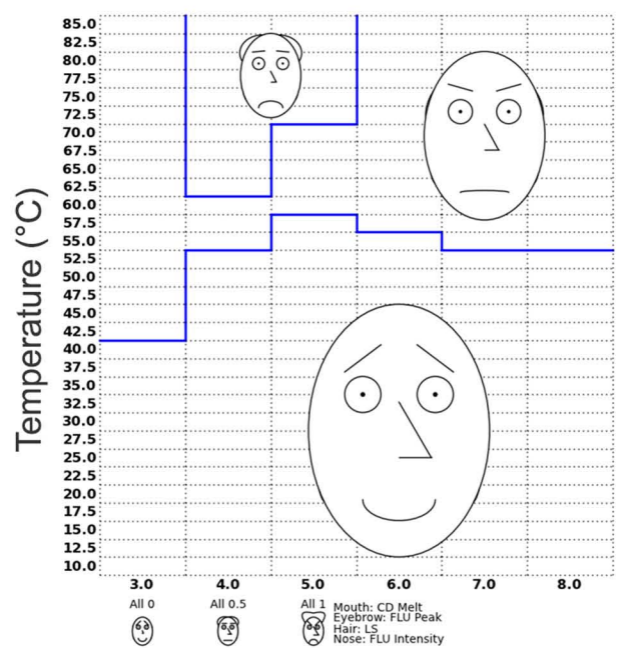**C**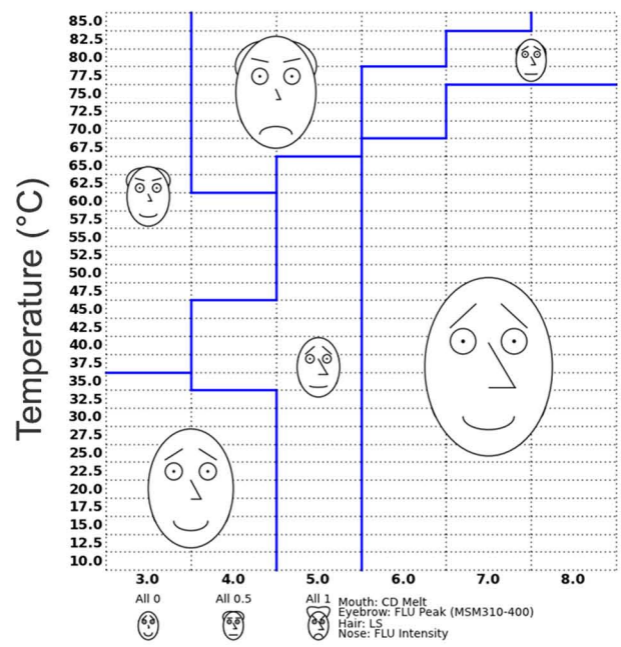

pH

**A**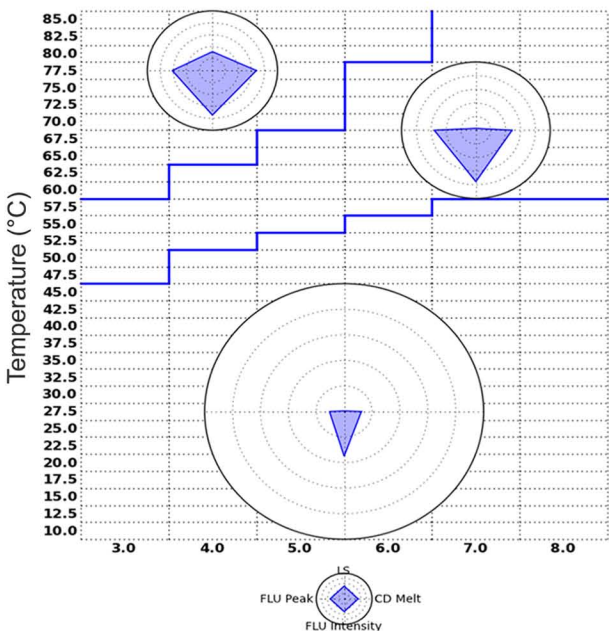**B**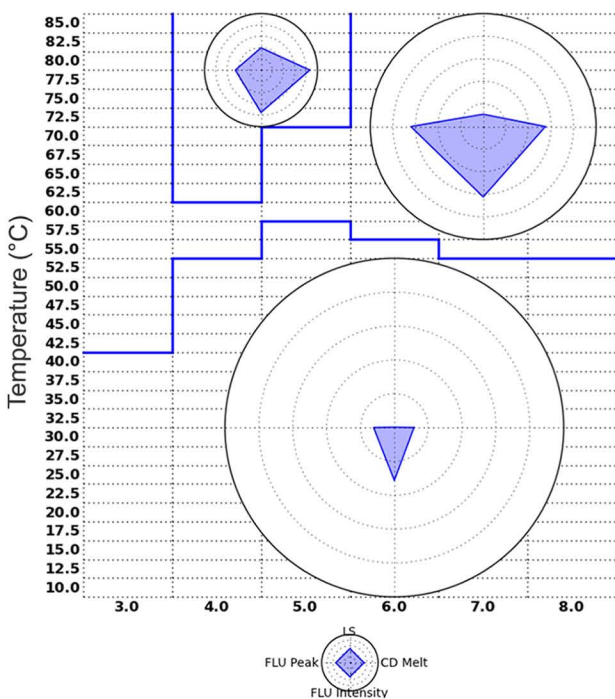**C**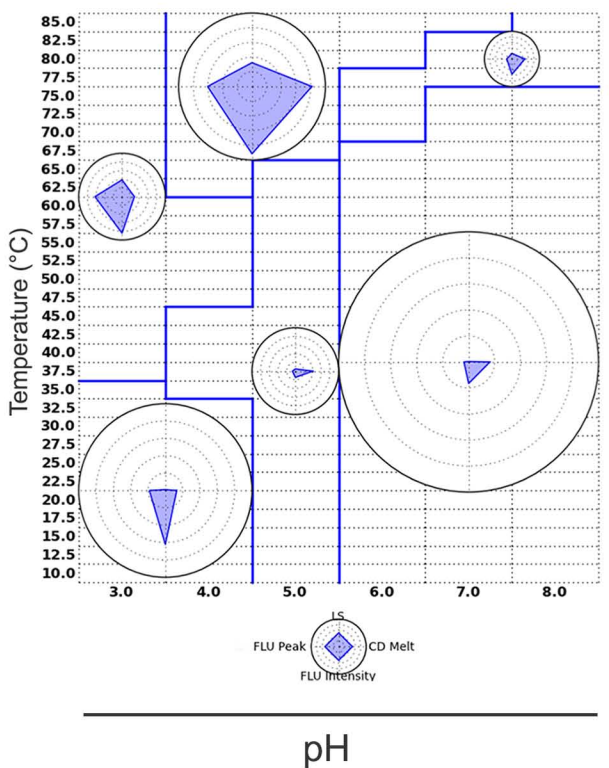

**A**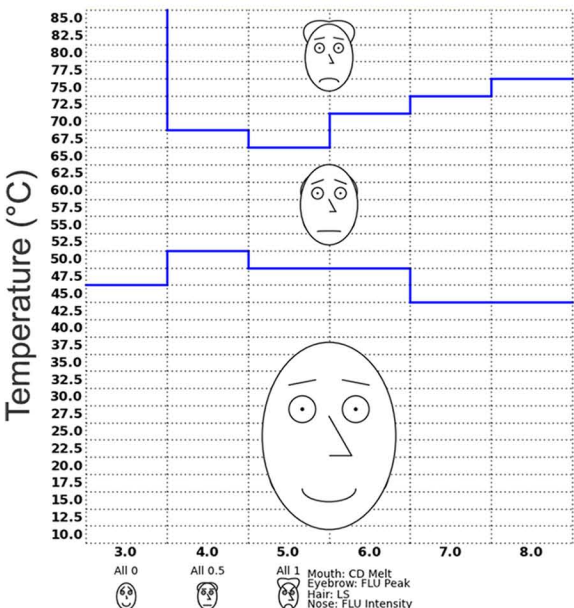**B**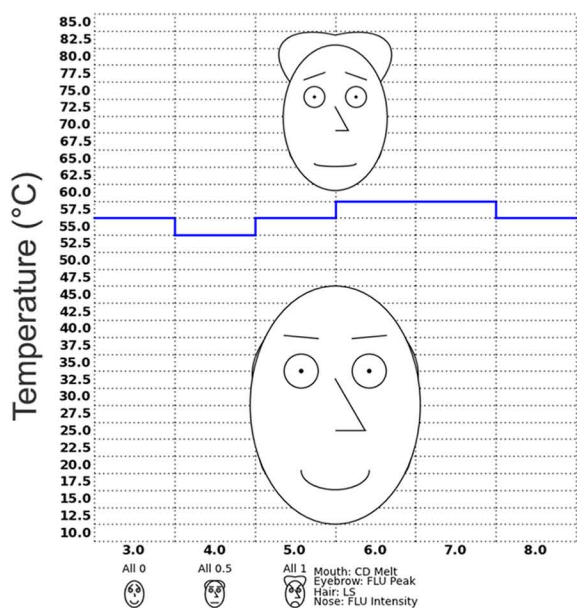**C**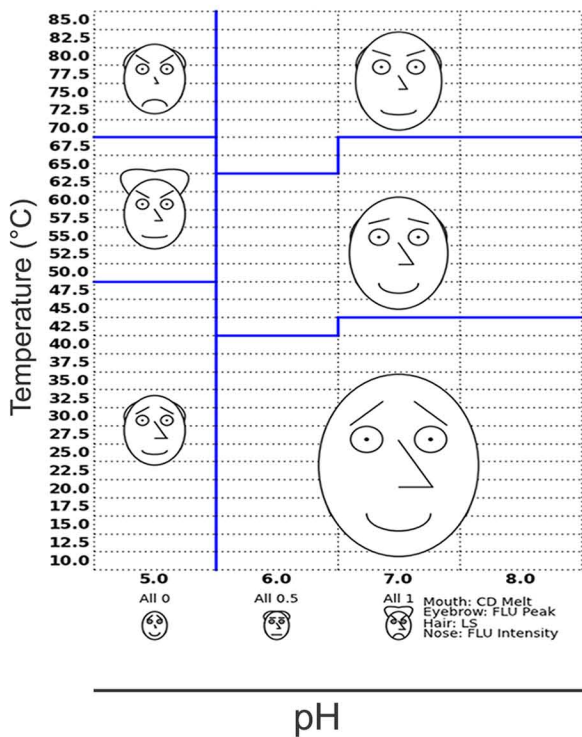

**A**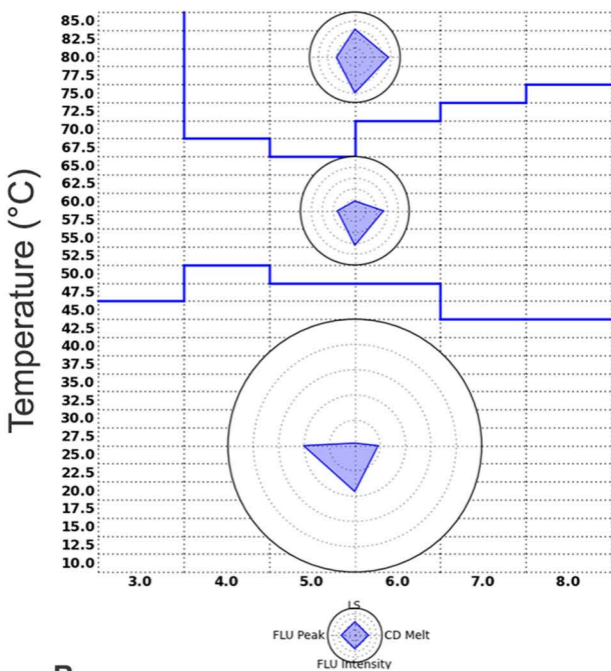**B**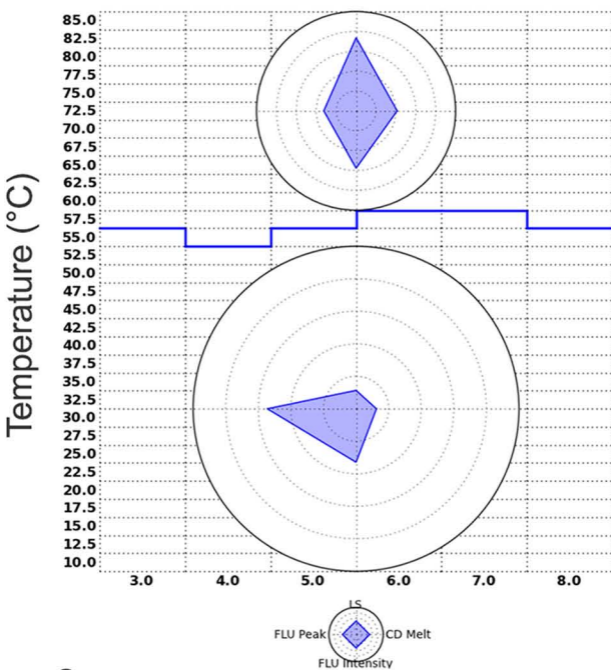**C**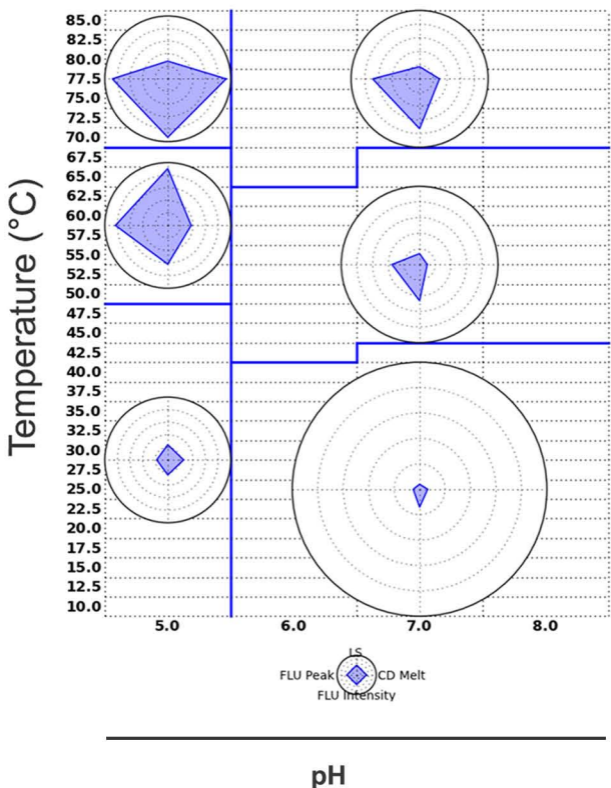

**A**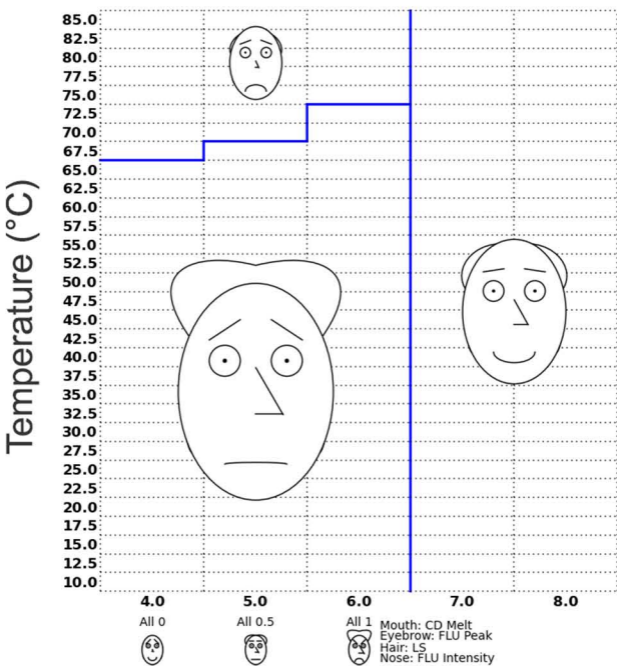**B**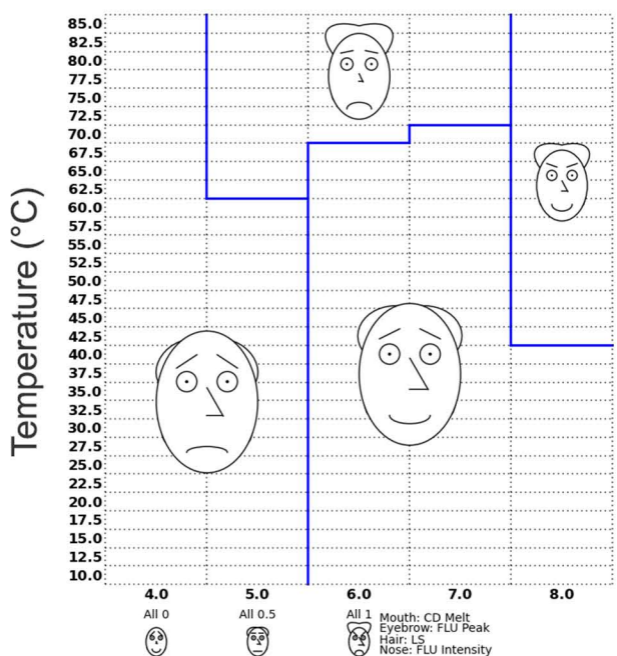**C**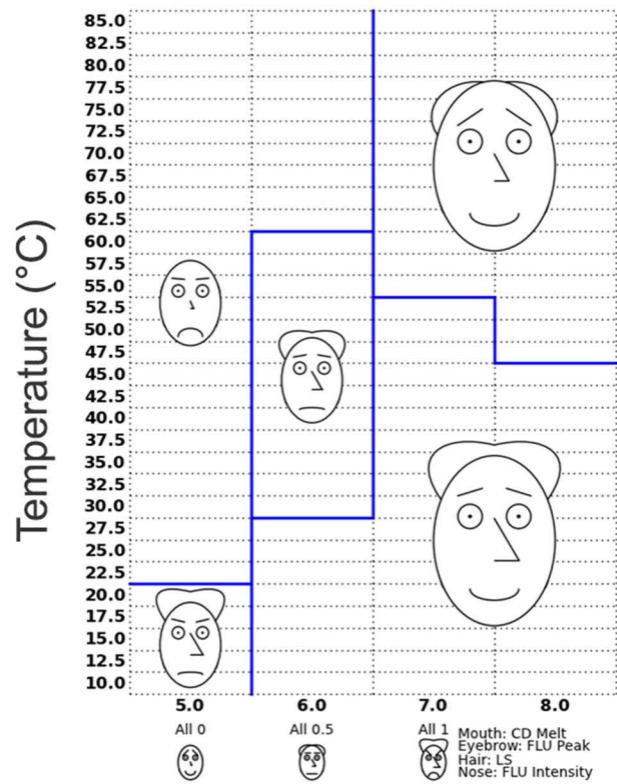

pH



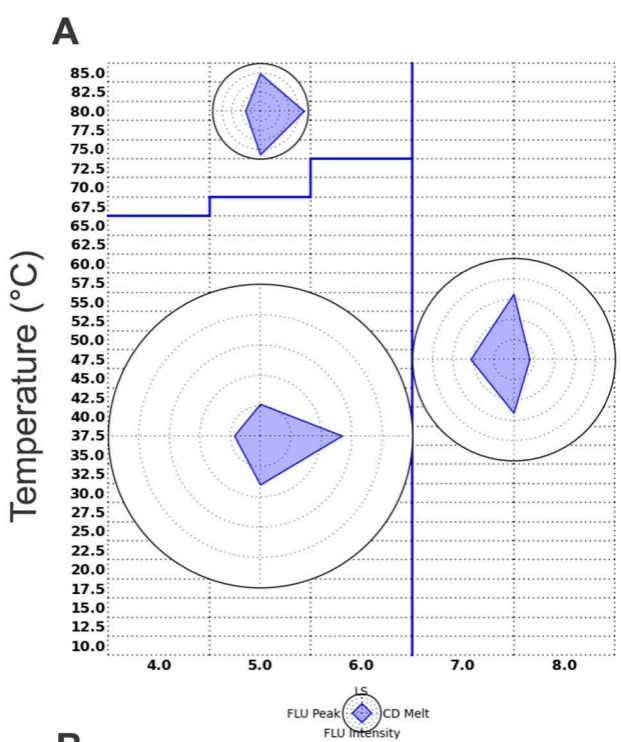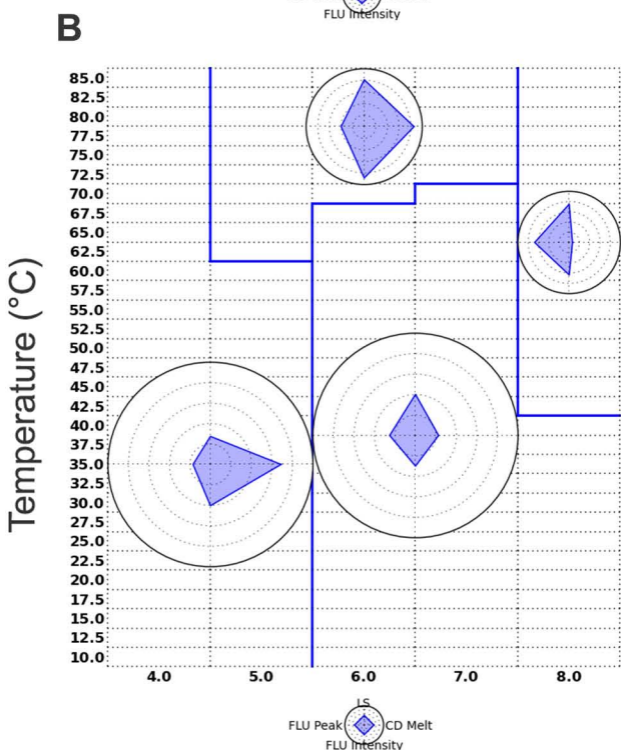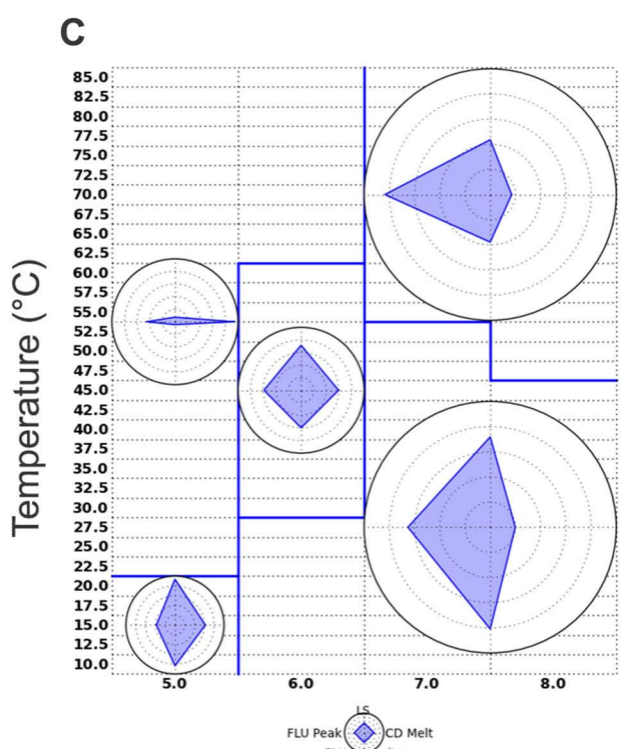

pH

Supplement: NIHMS598993-supplement-Supp_FigureS1-S17.pdf [file NIHMS598993-supplement-Supp_FigureS1-S17.pdf]
